# Supplementary material
Source: PubMed Central journal article supplement (PMC9427676)
Supplement: NIHMS1783996-supplement-Supplementary_Materials.pdf [file NIHMS1783996-supplement-Supplementary_Materials.pdf]

## **SUPPLEMENTARY MATERIAL**

### **Genomic Landscape of Endometrial Carcinomas of No Specific Molecular Profile**

Momeni-Boroujeni et al.

Supplementary Table S1

Supplementary Figures S1 – S7

**Supplementary Table S1 - Regression summaries of multivariate Cox regression disease-free and overall survival analysis of endometrial carcinomas of no special molecular profile (NSMP-EC).**

|                                                            | <b>coef</b> | <b>exp(coef)</b> | <b>se(coef)</b> | <b>Z</b> | <b>P-Value</b> |
|------------------------------------------------------------|-------------|------------------|-----------------|----------|----------------|
| <b>Disease-Free Survival</b>                               |             |                  |                 |          |                |
| Tumor Morphologic Category:<br>FIGO Grade 2                | 1.20740     | 3.34478          | 0.42980         | 2.80900  | 0.00497        |
| Tumor Morphologic Category:<br>FIGO Grade 3                | 2.34934     | 10.47867         | 0.44642         | 5.26300  | 0.00000        |
| Tumor Morphologic Category:<br>Non-endometrioid Morphology | 2.55677     | 12.89411         | 0.47325         | 5.40300  | 0.00000        |
| Genomic Cluster:<br>Cluster 2                              | 0.03201     | 1.03253          | 0.37084         | 0.08600  | 0.93121        |
| Genomic Cluster:<br>Cluster 3                              | 0.40672     | 1.50189          | 0.34731         | 1.17100  | 0.24157        |
| FIGO stage:<br>Stage II                                    | 0.80296     | 2.23214          | 0.57435         | 1.39800  | 0.16210        |
| FIGO stage:<br>Stage III                                   | 0.44768     | 1.56467          | 0.35074         | 1.27600  | 0.20183        |
| FIGO stage:<br>Stage IV                                    | 1.21554     | 3.37212          | 0.33304         | 3.65000  | 0.00026        |
| <b>Overall Survival</b>                                    |             |                  |                 |          |                |
| Tumor Morphologic Category:<br>FIGO Grade 2                | 1.95280     | 7.04850          | 0.81600         | 2.39300  | 0.01671        |
| Tumor Morphologic Category:<br>FIGO Grade 3                | 2.97590     | 19.60810         | 0.82060         | 3.62600  | 0.00029        |
| Tumor Morphologic Category:<br>Non-endometrioid Morphology | 3.42030     | 30.57870         | 0.81150         | 4.21500  | 0.00003        |
| Genomic Cluster:<br>Cluster 2                              | 1.29690     | 3.65780          | 0.65760         | 1.97200  | 0.04861        |
| Genomic Cluster:<br>Cluster 3                              | 1.39790     | 4.04650          | 0.65170         | 2.14500  | 0.03197        |
| FIGO stage:<br>Stage II                                    | 0.26020     | 1.29720          | 0.78020         | 0.33400  | 0.73875        |
| FIGO stage:<br>Stage III                                   | 0.68740     | 1.98860          | 0.44240         | 1.55400  | 0.12025        |
| FIGO stage:<br>Stage IV                                    | 1.55850     | 4.75170          | 0.41760         | 3.73200  | 0.00019        |

Supplementary Figure S1

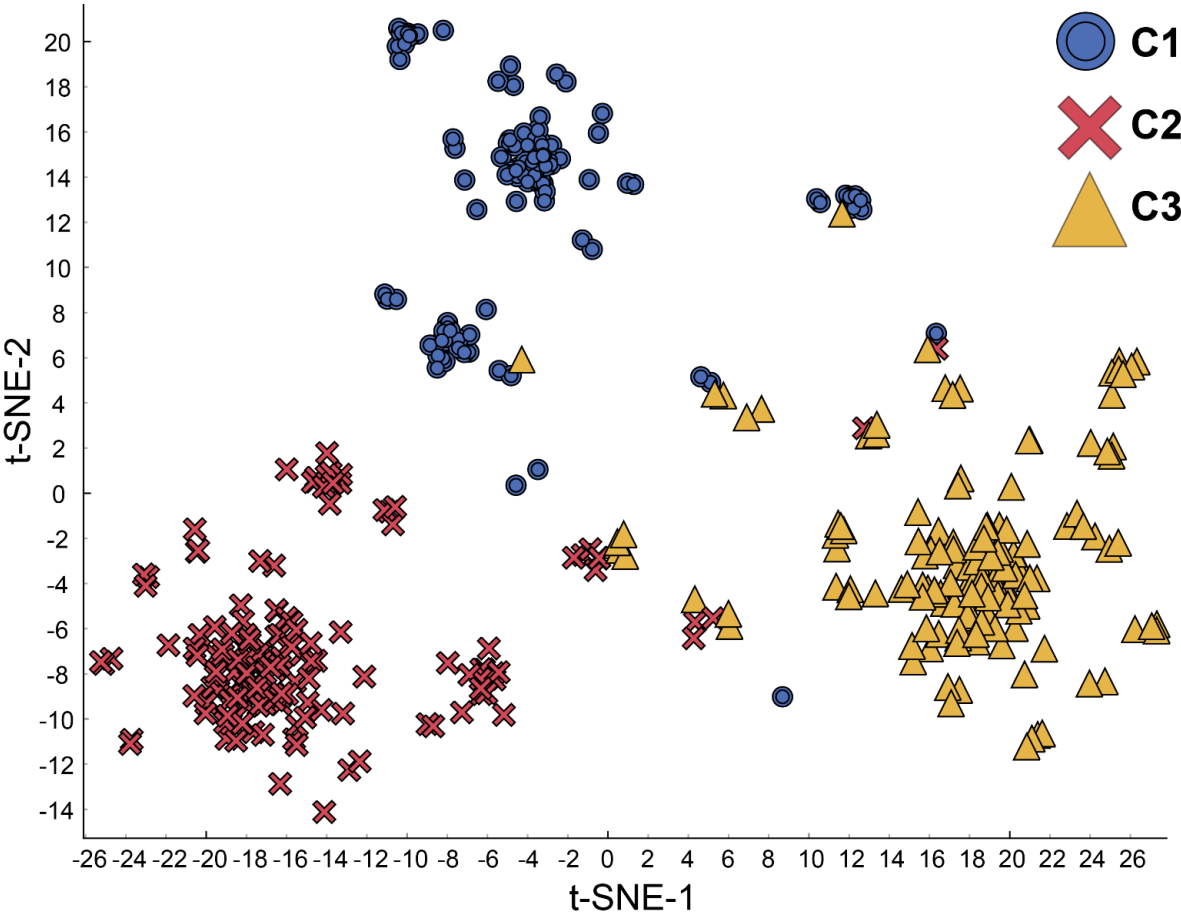

**Supplementary Figure S1.** Two-dimensional t-Distributed Stochastic Neighbor Embedding (t-SNE) map based on molecular features of endometrial carcinomas of no special molecular profile (NSMP-EC). HDBSCAN clustering shows the presence of 3 distinct molecular clusters among NSMP-EC tumors. C1, Cluster 1; C2, Cluster 2; C3, Cluster 3.

**Supplementary Figure S2**

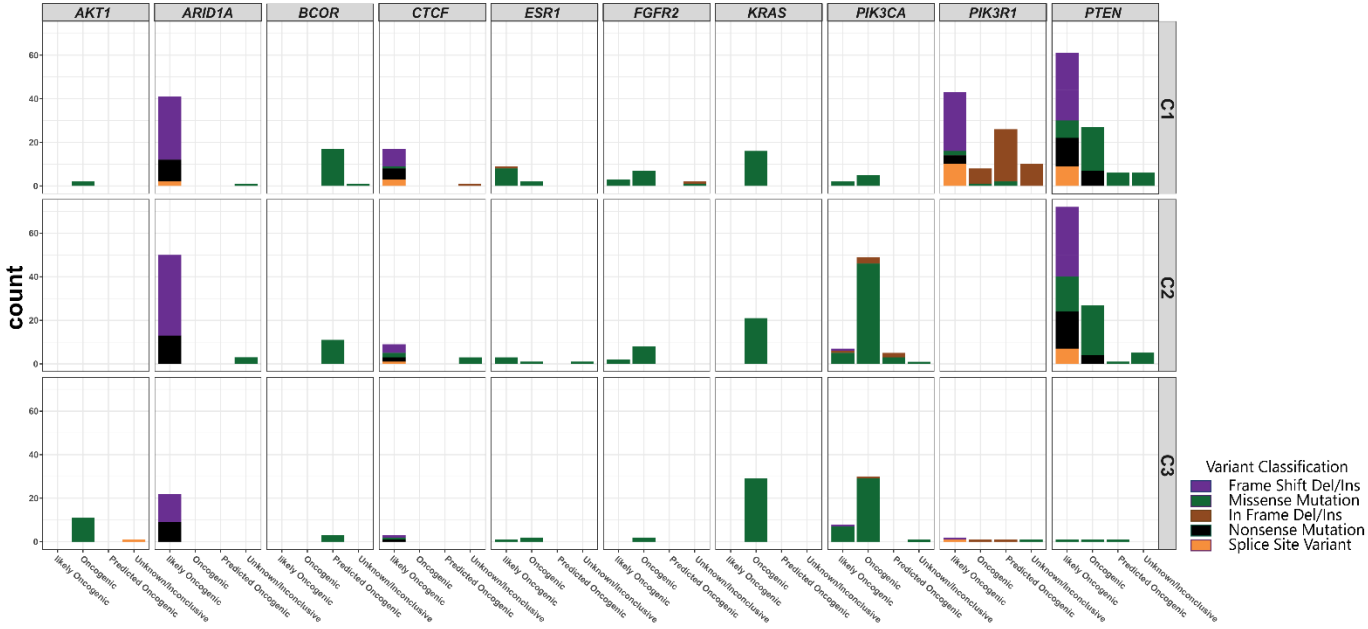

**Supplementary Figure S2.** Mutation function predictions of recurrently mutated genes in endometrial carcinomas of no special molecular profile (NSMP-EC). C1, Cluster 1; C2, Cluster 2; C3, Cluster 3.

## Supplementary Figure S3

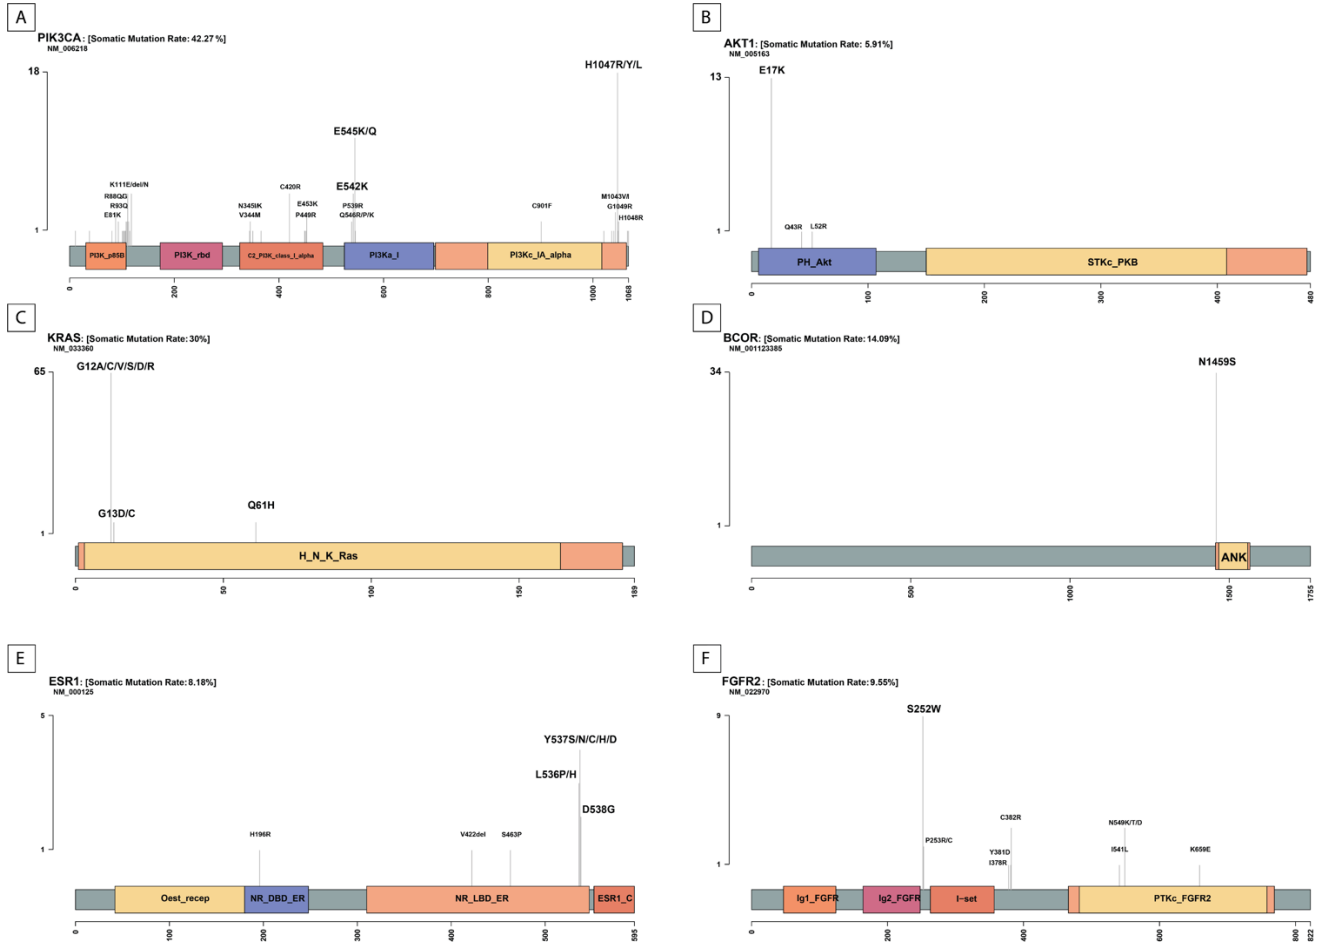

**Supplementary Figure S3.** Distribution of somatic *PIK3CA*, *AKT1*, *KRAS*, *BCOR*, *ESR1*, *FGFR2* mutations in endometrial carcinomas of no special molecular profile (NSMP-EC).

## Supplementary Figure S4

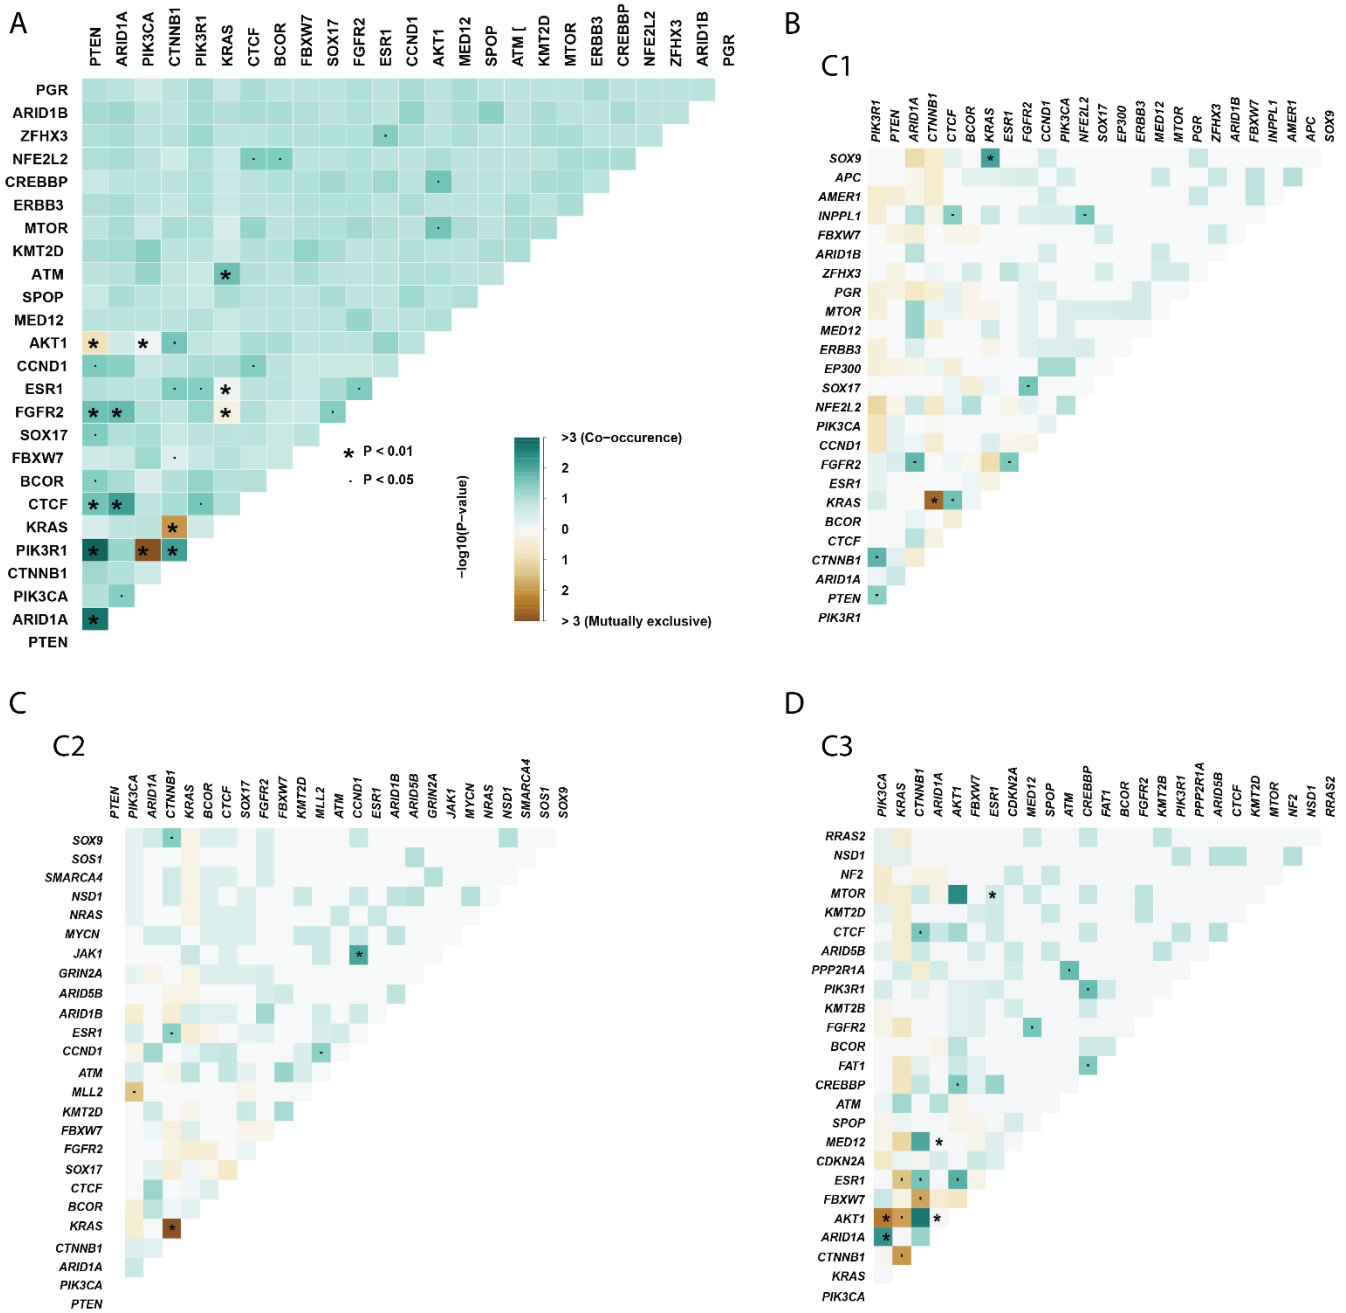

**Supplementary Figure S4.** Distance matrix showing the somatic interaction of commonly altered genes in endometrial carcinomas of no special molecular profile (NSMP-EC) (A) and among molecular clusters (B-D). Significant co-occurrences are marked in shades of green and the significant mutual exclusivity marked in shades of brown. The size of the \* depicts the p-value and the intensity of color shows the degree of association or exclusion. C1, Cluster 1; C2, Cluster 2; C3, Cluster 3.

Supplementary Figure S5

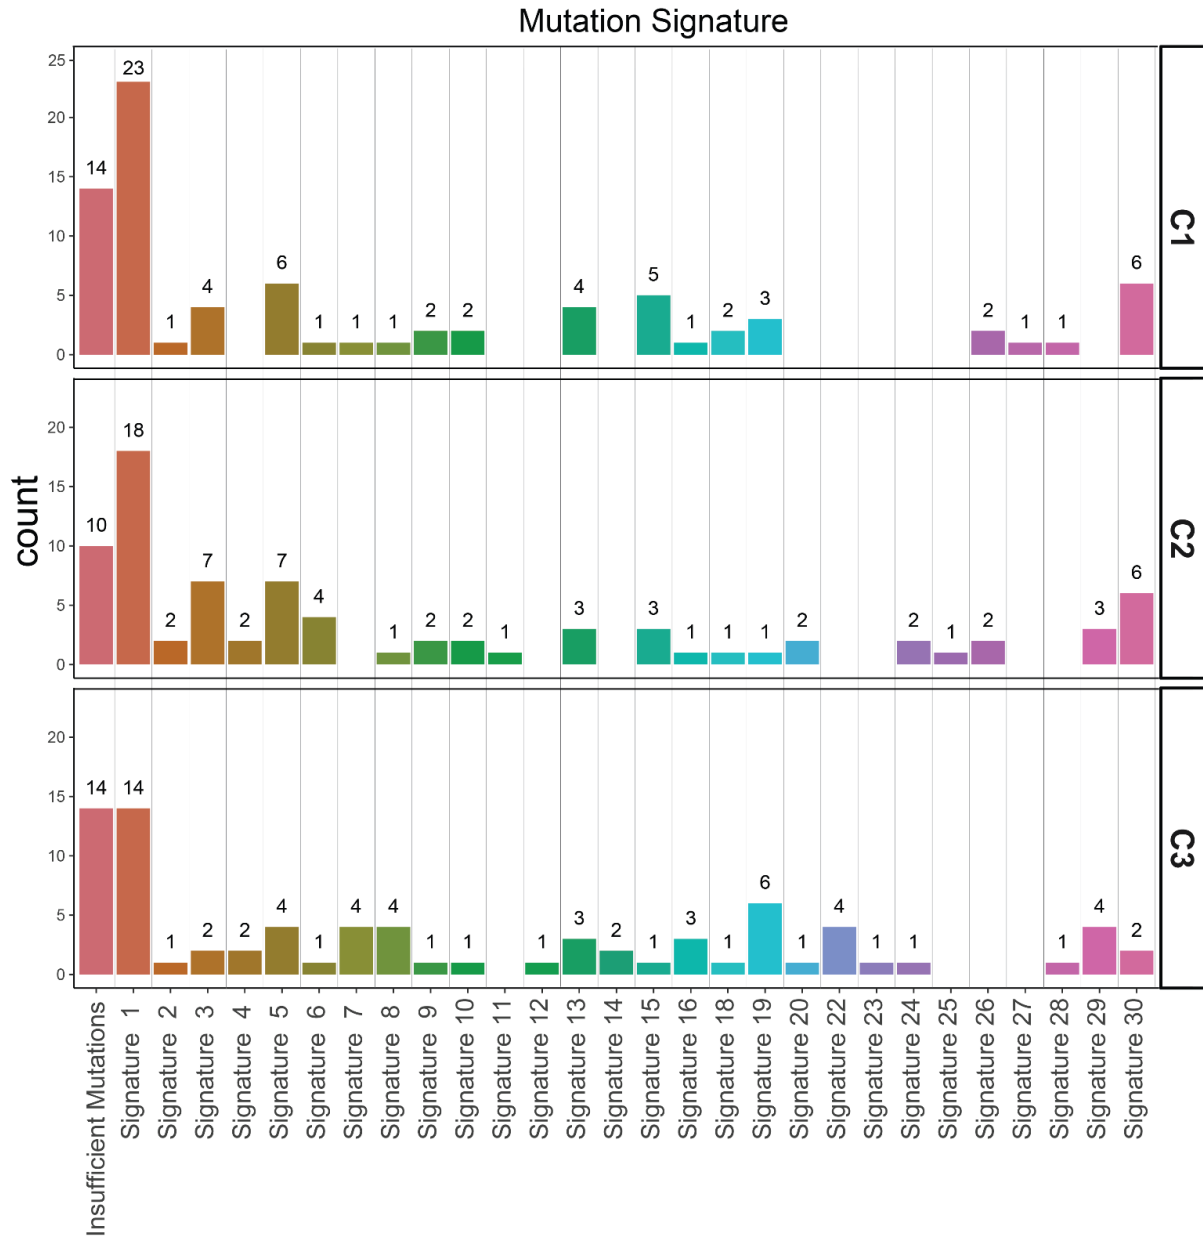

**Supplementary Figure S5.** Distribution of mutational signatures in endometrial carcinomas of no special molecular profile (NSMP-EC). C1, Cluster 1; C2, Cluster 2; C3, Cluster 3.

Supplementary Figure S6

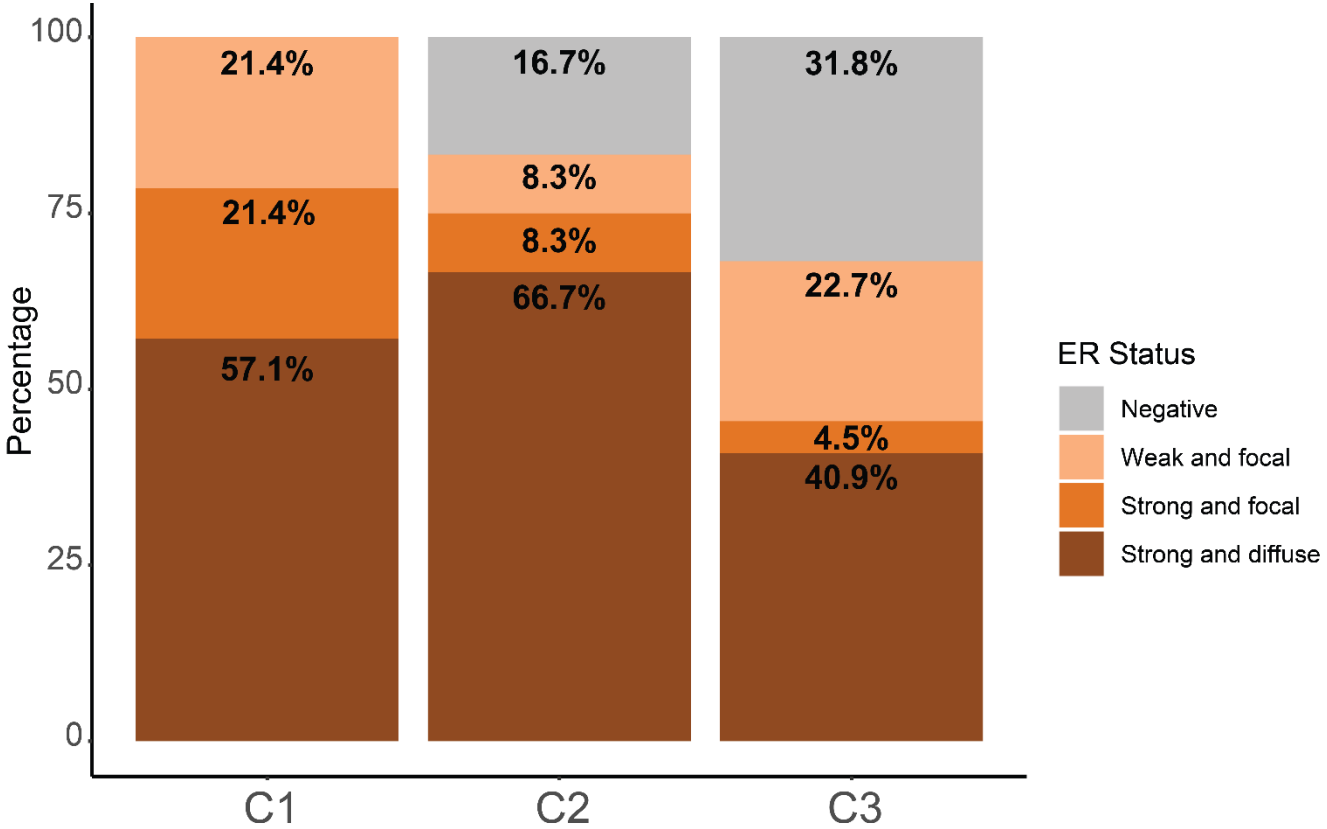

Supplementary Figure S6. Distribution of estrogen receptor expression by immunohistochemistry among the molecular clusters of endometrial carcinomas of no special molecular profile (NSMP-EC). C1, Cluster 1; C2, Cluster 2; C3, Cluster 3.



**Supplementary Figure S7**

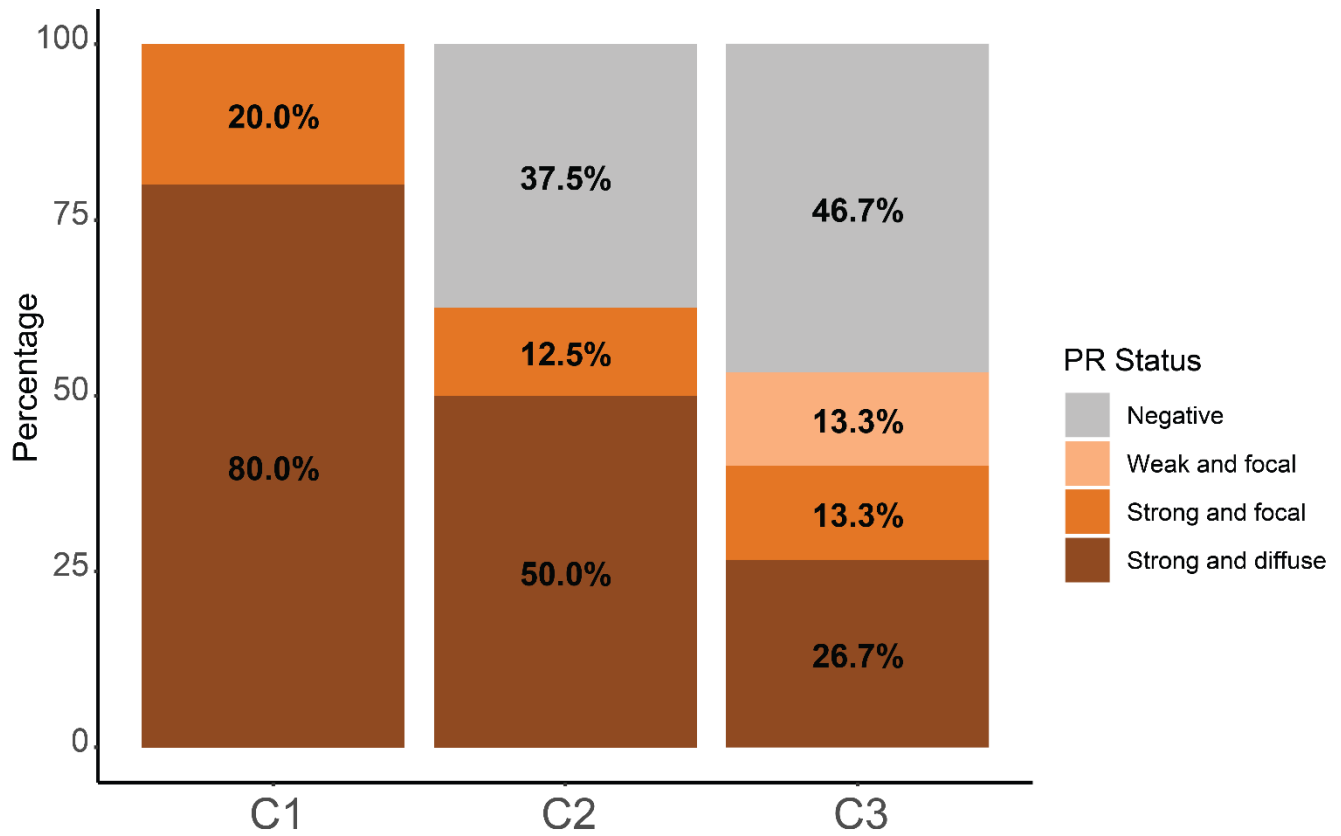

**Supplementary Figure S7.** Distribution of progesterone receptor expression by immunohistochemistry among the molecular clusters of endometrial carcinomas of no special molecular profile (NSMP-EC). C1, Cluster 1; C2, Cluster 2; C3, Cluster 3.
